# Supplementary material for: DNA Barcoding and Species Delimitation for Dogfish Sharks Belonging to the Squalus Genus (Squaliformes: Squalidae)
Source: MDPI journal article supplement (doi:10.3390/d14070544), 2022-07-06

**Figure S1.** Samples collected from individuals of the genus *Squalus* in the Western Atlantic Ocean and Pacific Ocean.

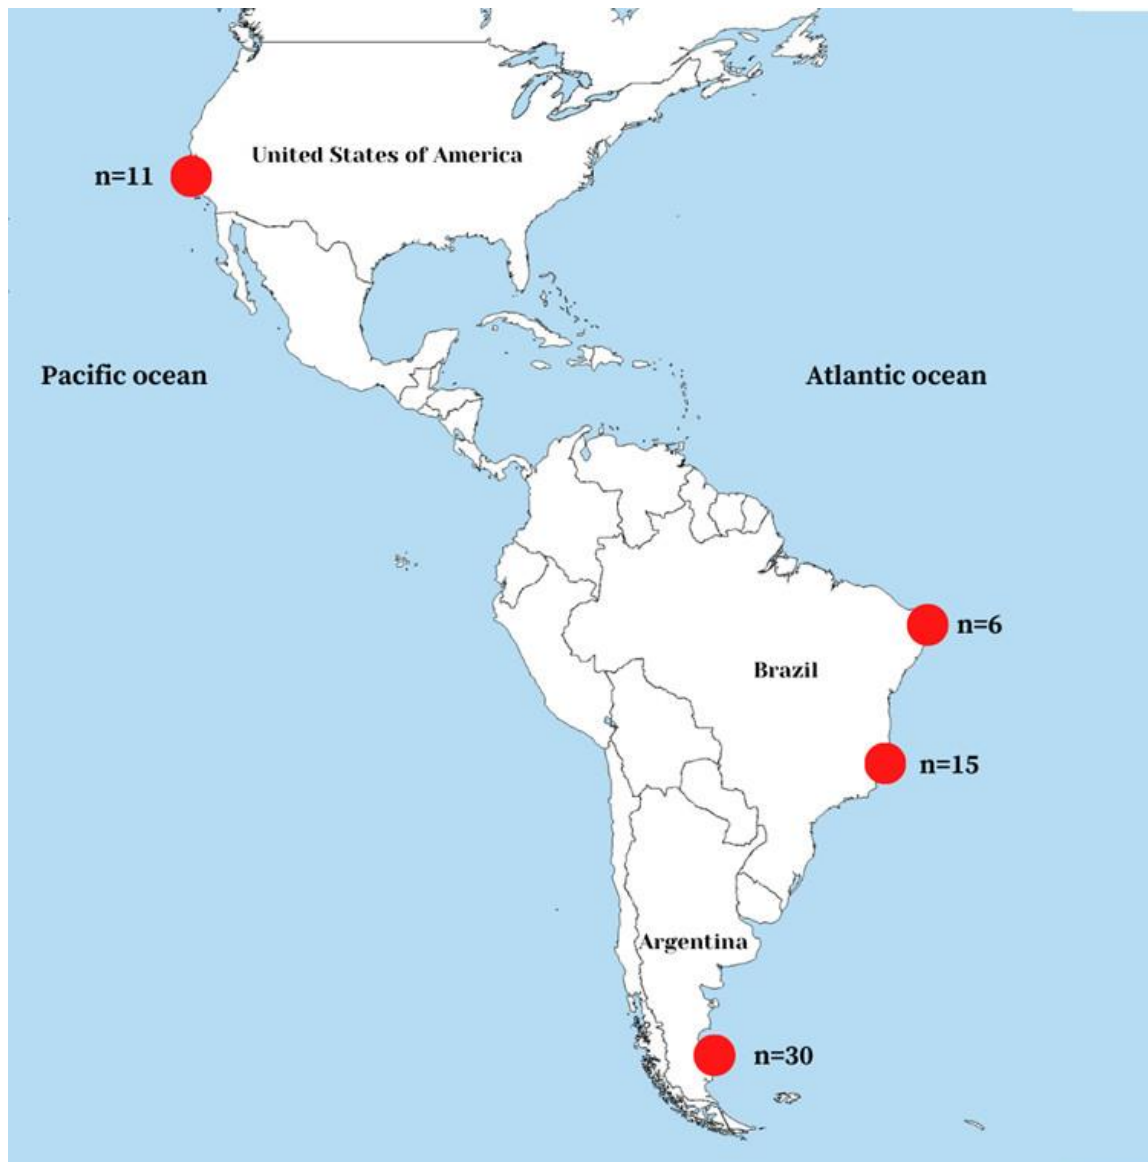

Supplement: s1 [file s1]
