# Supplementary material for: DNA Barcoding and Species Delimitation for Dogfish Sharks Belonging to the Squalus Genus (Squaliformes: Squalidae)
Source: MDPI journal article supplement (doi:10.3390/d14070544), 2022-07-06
Supplement: s1 [file s1]

Table S1. Species, locality, Sequence ID, analyses in this study, and GenBank accession numbers of specimens of *Squalus*.

| Species                   | Locality          | Sequence ID     | ABGD | PTP | GMYC | ID Genbank | Reference            |
|---------------------------|-------------------|-----------------|------|-----|------|------------|----------------------|
| <i>Squalus blainville</i> | Aegean Sea        | KU198581SbAesea | 3    | 8   | 1    | KU198581   | Kousteni et al. [45] |
| <i>Squalus blainville</i> | Ionian Sea        | KU198516SbMedt  | 3    | 8   | 1    | KU198516   | Kousteni et al. [45] |
| <i>Squalus blainville</i> | Aegean Sea        | KU198579SbAesea | 3    | 8   | 1    | KU198579   | Kousteni et al. [45] |
| <i>Squalus blainville</i> | Hannaba - Algeria | KT307445SbDZA   | 3    | 8   | 1    | KT307445   | Kousteni et al. [45] |
| <i>Squalus blainville</i> | Cretan Sea        | KU198504SbCrsea | 3    | 8   | 2    | KU198504   | Kousteni et al. [45] |
| <i>Squalus blainville</i> | Malta             | KJ709926SbMLT   | 3    | 8   | 2    | KJ709926   | Landi et al. [47]    |
| <i>Squalus blainville</i> | Cretan Sea        | KU198517SbIosea | 3    | 8   | 2    | KU198517   | Kousteni et al. [45] |
| <i>Squalus blainville</i> | Sicily - Italy    | KJ709641SbITA   | 3    | 8   | 2    | KJ709641   | Landi et al. [47]    |
| <i>Squalus blainville</i> | Malta             | KY909556SbMLT   | 3    | 8   | 2    | KY909556   | Vella et al. [28]    |
| <i>Squalus blainville</i> | Malta             | KY909558SbMLT   | 3    | 8   | 2    | KY909558   | Vella et al. [28]    |
| <i>Squalus blainville</i> | Malta             | KY909549SbMLT   | 3    | 8   | 2    | KY909549   | Vella et al. [28]    |
| <i>Squalus blainville</i> | Malta             | KJ709924SbMLT   | 3    | 8   | 2    | KJ709924   | Landi et al. [47]    |
| <i>Squalus blainville</i> | Greece            | KP192406SbGRC   | 3    | 8   | 2    | KP192406   | Gkafas et al. [54]   |
| <i>Squalus blainville</i> | Sardina - Italy   | MF828596SbITA   | 3    | 8   | 2    | MF828596   | Bellodi et al. [22]  |
| <i>Squalus blainville</i> | Sardina - Italy   | MF828599SbITA   | 3    | 8   | 2    | MF828599   | Bellodi et al. [22]  |
| <i>Squalus blainville</i> | Sardina - Italy   | MF828603SbITA   | 3    | 8   | 2    | MF828603   | Bellodi et al. [22]  |
| <i>Squalus blainville</i> | Sardina - Italy   | MF828606SbITA   | 3    | 8   | 2    | MF828606   | Bellodi et al. [22]  |
| <i>Squalus blainville</i> | Sardina - Italy   | MF828607SbITA   | 3    | 8   | 2    | MF828607   | Bellodi et al. [22]  |
| <i>Squalus blainville</i> | Sardina - Italy   | MF828612SbITA   | 3    | 8   | 2    | MF828612   | Bellodi et al. [22]  |
| <i>Squalus blainville</i> | Ionian Sea        | KU198522SbIosea | 3    | 8   | 2    | KU198522   | Kousteni et al. [45] |
| <i>Squalus blainville</i> | Libyan Sea        | KU198545SbLbsea | 3    | 8   | 2    | KU198545   | Kousteni et al. [45] |
| <i>Squalus blainville</i> | Malta             | KY909552SbMLT   | 3    | 8   | 2    | KY909552   | Vella et al. [28]    |
| <i>Squalus blainville</i> | Malta             | KJ709925SbMLT   | 3    | 8   | 2    | KJ709925   | Landi et al. [47]    |
| <i>Squalus blainville</i> | Malta             | KY909559SbMLT   | 3    | 8   | 2    | KY909559   | Vella et al. [28]    |
| <i>Squalus blainville</i> | Ionian Sea        | KU198507SbCrsea | 3    | 8   | 2    | KU198507   | Kousteni et al. [45] |
| <i>Squalus blainville</i> | Ionian Sea        | KU198512SbMedt  | 3    | 8   | 2    | KU198512   | Kousteni et al. [45] |
| <i>Squalus blainville</i> | Ionian Sea        | KU198515SbMedt  | 3    | 8   | 2    | KU198515   | Kousteni et al. [45] |
| <i>Squalus blainville</i> | Ionian Sea        | KU198533SbMedt  | 3    | 8   | 2    | KU198533   | Kousteni et al. [45] |
| <i>Squalus blainville</i> | Ionian Sea        | KU198540SbMedt  | 3    | 8   | 2    | KU198540   | Kousteni et al. [45] |
| <i>Squalus blainville</i> | Libyan Sea        | KU198552SbLbsea | 3    | 8   | 2    | KU198552   | Kousteni et al. [45] |
| <i>Squalus blainville</i> | Aegean Sea        | KU198568SbAesea | 3    | 8   | 2    | KU198568   | Kousteni et al. [45] |
| <i>Squalus blainville</i> | Aegean Sea        | KU198571SbAesea | 3    | 8   | 2    | KU198571   | Kousteni et al. [45] |

|                           |                      |                 |   |   |   |          |                      |
|---------------------------|----------------------|-----------------|---|---|---|----------|----------------------|
| <i>Squalus blainville</i> | Aegean Sea           | KU198588SbAesea | 3 | 8 | 2 | KU198588 | Kousteni et al. [45] |
| <i>Squalus blainville</i> | Libyan Sea           | KU198563SbLbsea | 3 | 8 | 2 | KU198563 | Kousteni et al. [45] |
| <i>Squalus blainville</i> | Aegean Sea           | KU198573SbAesea | 3 | 8 | 3 | KU198573 | Kousteni et al. [45] |
| <i>Squalus blainville</i> | Aegean Sea           | KU198589SbAesea | 3 | 8 | 3 | KU198589 | Kousteni et al. [45] |
| <i>Squalus blainville</i> | Aegean Sea           | KU198570SbAesea | 3 | 8 | 3 | KU198570 | Kousteni et al. [45] |
| <i>Squalus blainville</i> | Libyan Sea           | KU198561SbLbsea | 3 | 8 | 3 | KU198561 | Kousteni et al. [45] |
| <i>Squalus blainville</i> | Libyan Sea           | KU198555SbLbsea | 3 | 8 | 3 | KU198555 | Kousteni et al. [45] |
| <i>Squalus blainville</i> | Libyan Sea           | KU198549SbLbsea | 3 | 8 | 3 | KU198549 | Kousteni et al. [45] |
| <i>Squalus blainville</i> | Ionian Sea           | KU198542SbMedt  | 3 | 8 | 3 | KU198542 | Kousteni et al. [45] |
| <i>Squalus blainville</i> | Ionian Sea           | KU198541SbMedt  | 3 | 8 | 3 | KU198541 | Kousteni et al. [45] |
| <i>Squalus blainville</i> | Ionian Sea           | KU198539SbMedt  | 3 | 8 | 3 | KU198539 | Kousteni et al. [45] |
| <i>Squalus blainville</i> | Ionian Sea           | KU198536SbMedt  | 3 | 8 | 3 | KU198536 | Kousteni et al. [45] |
| <i>Squalus blainville</i> | Ionian Sea           | KU198532SbMedt  | 3 | 8 | 3 | KU198532 | Kousteni et al. [45] |
| <i>Squalus blainville</i> | Ionian Sea           | KU198528SbMedt  | 3 | 8 | 3 | KU198528 | Kousteni et al. [45] |
| <i>Squalus blainville</i> | Ionian Sea           | KU198524SbMedt  | 3 | 8 | 3 | KU198524 | Kousteni et al. [45] |
| <i>Squalus blainville</i> | Ionian Sea           | KU198519SbMedt  | 3 | 8 | 3 | KU198519 | Kousteni et al. [45] |
| <i>Squalus blainville</i> | Cyclades Islands     | KU198510SbCyI   | 3 | 8 | 3 | KU198510 | Kousteni et al. [45] |
| <i>Squalus blainville</i> | Cretan Sea           | KU198505SbCrsea | 3 | 8 | 3 | KU198505 | Kousteni et al. [45] |
| <i>Squalus blainville</i> | Cretan Sea           | KU198499SbCrsea | 3 | 8 | 3 | KU198499 | Kousteni et al. [45] |
| <i>Squalus blainville</i> | Cretan Sea           | KU198498SbCrsea | 3 | 8 | 3 | KU198498 | Kousteni et al. [45] |
| <i>Squalus blainville</i> | Cretan Sea           | KU198497SbCrsea | 3 | 8 | 3 | KU198497 | Kousteni et al. [45] |
| <i>Squalus blainville</i> | the Balearic Islands | KU198491SbBAIS  | 3 | 8 | 3 | KU198491 | Kousteni et al. [45] |
| <i>Squalus blainville</i> | Malta                | KY909547SbMLT   | 3 | 8 | 3 | KY909547 | Vella et al. [28]    |
| <i>Squalus blainville</i> | Malta                | KY909548SbMLT   | 3 | 8 | 3 | KY909548 | Vella et al. [28]    |
| <i>Squalus blainville</i> | Malta                | KY909553SbMLT   | 3 | 8 | 3 | KY909553 | Vella et al. [28]    |
| <i>Squalus blainville</i> | Malta                | KY909554SbMLT   | 3 | 8 | 3 | KY909554 | Vella et al. [28]    |
| <i>Squalus blainville</i> | Malta                | KY909557SbMLT   | 3 | 8 | 3 | KY909557 | Vella et al. [28]    |
| <i>Squalus blainville</i> | Sardina - Italy      | MF828598SbITA   | 3 | 8 | 3 | MF828598 | Bellodi et al. [22]  |
| <i>Squalus blainville</i> | Sardina - Italy      | MF828600SbITA   | 3 | 8 | 3 | MF828600 | Bellodi et al. [22]  |
| <i>Squalus blainville</i> | Sardina - Italy      | MF828604SbITA   | 3 | 8 | 3 | MF828604 | Bellodi et al. [22]  |
| <i>Squalus blainville</i> | Sardina - Italy      | MF828605SbITA   | 3 | 8 | 3 | MF828605 | Bellodi et al. [22]  |
| <i>Squalus blainville</i> | Sardina - Italy      | MF828609SbITA   | 3 | 8 | 3 | MF828609 | Bellodi et al. [22]  |
| <i>Squalus blainville</i> | Sardina - Italy      | MF828611SbITA   | 3 | 8 | 3 | MF828611 | Bellodi et al. [22]  |
| <i>Squalus blainville</i> | Sardina - Italy      | MF828613SbITA   | 3 | 8 | 3 | MF828613 | Bellodi et al. [22]  |
| <i>Squalus blainville</i> | Balearic Islands     | KU198488SbBAIS  | 3 | 8 | 3 | KU198488 | Kousteni et al. [45] |

|                             |                             |                 |   |   |   |          |                          |
|-----------------------------|-----------------------------|-----------------|---|---|---|----------|--------------------------|
| <i>Squalus blainville</i>   | Agulhas Bank - South Africa | JF494585SbZAF   | 3 | 8 | 3 | JF494585 | Steinke et al. [53]      |
| <i>Squalus blainville</i>   | Malta                       | KY909550SbMLT   | 3 | 8 | 3 | KY909550 | Vella et al. [28]        |
| <i>Squalus blainville</i>   | Cretan Sea                  | KU198509SbCrsea | 3 | 8 | 3 | KU198509 | Kousteni et al. [45]     |
| <i>Squalus blainville</i>   | Aegean Sea                  | KU198594SbAesea | 3 | 8 | 3 | KU198594 | Kousteni et al. [45]     |
| <i>Squalus blainville</i>   | Aegean Sea                  | KU198569SbAesea | 3 | 8 | 3 | KU198569 | Kousteni et al. [45]     |
| <i>Squalus blainville</i>   | Ionian Sea                  | KU198521SbMedt  | 3 | 8 | 3 | KU198521 | Kousteni et al. [45]     |
| <i>Squalus blainville</i>   | Sardina - Italy             | MF828608SbITA   | 3 | 8 | 3 | MF828608 | Bellodi et al. [22]      |
| <i>Squalus blainville</i>   | the north Aegean Sea        | KU198585SbAesea | 3 | 8 | 3 | KU198585 | Kousteni et al. [45]     |
| <i>Squalus blainville</i>   | the north Aegean Sea        | KU198591SbAesea | 3 | 8 | 3 | KU198591 | Kousteni et al. [45]     |
| <i>Squalus blainville</i>   | Malta                       | KJ709923SbMLT   | 3 | 8 | 3 | KJ709923 | Landi et al. [47]        |
| <i>Squalus blainville</i>   | Ionian Sea                  | KU198520SbMedt  | 3 | 8 | 3 | KU198520 | Kousteni et al. [45]     |
| <i>Squalus blainville</i>   | Ionian Sea                  | KU198526SbMedt  | 3 | 8 | 3 | KU198526 | Kousteni et al. [45]     |
| <i>Squalus blainville</i>   | Ionian Sea                  | KU198556SbLbsea | 3 | 8 | 3 | KU198556 | Kousteni et al. [45]     |
| <i>Squalus blainville</i>   | Aegean Sea                  | KU198584SbAesea | 3 | 8 | 3 | KU198584 | Kousteni et al. [45]     |
| <i>Squalus blainville</i>   | Aegean Sea                  | KU198576SbAesea | 3 | 8 | 3 | KU198576 | Kousteni et al. [45]     |
| <i>Squalus blainville</i>   | Aegean Sea                  | KU198592SbAesea | 3 | 8 | 3 | KU198592 | Kousteni et al. [45]     |
| <i>Squalus blainville</i>   | Cretan_Sea                  | KU198525SbMedt  | 3 | 8 | 3 | KU198525 | Kousteni et al. [45]     |
| <i>Squalus blainville</i>   | Malta                       | KY909555SbMLT   | 3 | 8 | 4 | KY909555 | Vella et al. [28]        |
| <i>Squalus blainville</i>   | Malta                       | KY909551SbMLT   | 3 | 8 | 4 | KY909551 | Vella et al. [28]        |
| <i>Squalus blainville</i>   | Sardina - Italy             | MF828610SbITA   | 3 | 8 | 4 | MF828610 | Bellodi et al. [22]      |
| <i>Squalus blainville</i>   | the north Aegean Sea        | KU198582SbAesea | 3 | 8 | 4 | KU198582 | Kousteni et al. [45]     |
| <i>Squalus blainville</i>   | Cretan Sea                  | KU198492SbCrsea | 3 | 8 | 4 | KU198492 | Kousteni et al. [45]     |
| <i>Squalus blainville</i>   | Aegean Sea                  | KU198567SbAesea | 3 | 8 | 4 | KU198567 | Kousteni et al. [45]     |
| <i>Squalus blainville</i>   | Sardina - Italy             | MF828601SbITA   | 3 | 9 | 4 | MF828601 | Bellodi et al. [22]      |
| <i>Squalus brevirostris</i> | Kyushu-chiho - Japan        | EF539293SbrJPN  | 3 | 9 | 5 | EF539293 | Ward et al. [27]         |
| <i>Squalus brevirostris</i> | Kyushu-chiho - Japan        | EF539295SbrJPN  | 3 | 9 | 5 | EF539295 | Ward et al. [27]         |
| <i>Squalus brevirostris</i> | Kyushu-chiho - Japan        | EF539294SbrJPN  | 3 | 9 | 5 | EF539294 | Ward et al. [27]         |
| <i>Squalus brevirostris</i> | Minna Island - Japan        | MT123834SbrJPN  | 3 | 9 | 5 | MT123834 | Ziadi-Künzli et al. [25] |
| <i>Squalus brevirostris</i> | Minna Island - Japan        | MT123833SbrJPN  | 3 | 9 | 5 | MT123833 | Ziadi-Künzli et al. [25] |
| <i>Squalus brevirostris</i> | Minna Island - Japan        | MT123832SbrJPN  | 3 | 9 | 5 | MT123832 | Ziadi-Künzli et al. [25] |
| <i>Squalus brevirostris</i> | Minna Island - Japan        | MT123831SbrJPN  | 3 | 9 | 5 | MT123831 | Ziadi-Künzli et al. [25] |
| <i>Squalus brevirostris</i> | Minna Island - Japan        | MT123830SbrJPN  | 3 | 9 | 5 | MT123830 | Ziadi-Künzli et al. [25] |
| <i>Squalus brevirostris</i> | Minna Island - Japan        | MT123829SbrJPN  | 3 | 9 | 5 | MT123829 | Ziadi-Künzli et al. [25] |
| <i>Squalus cubensis</i>     | Gulf of Mexico - Mexico     | MG792174ScuMEX  | 3 | 7 | 6 | MG792174 | Pfleger et al. [4]       |
| <i>Squalus cubensis</i>     | Gulf of Mexico - Mexico     | MG792175ScuMEX  | 3 | 7 | 6 | MG792175 | Pfleger et al. [4]       |

|                           |                            |                |   |   |   |          |                           |
|---------------------------|----------------------------|----------------|---|---|---|----------|---------------------------|
| <i>Squalus cubensis</i>   | Gulf of Mexico - Mexico    | MG792172ScuMEX | 3 | 7 | 6 | MG792172 | Pfleger et al. [4]        |
| <i>Squalus cubensis</i>   | Gulf of Mexico - Mexico    | FN431670ScuMEX | 3 | 7 | 6 | FN431670 | Stelbrink et al. [48]     |
| <i>Squalus cubensis</i>   | Rio Grande do Sul - Brazil | MG703562ScuMEX | 3 | 7 | 6 | MG703562 | Almeron-Souza et al. [49] |
| <i>Squalus cubensis</i>   | Gulf of Mexico - Mexico    | MG792171ScuMEX | 3 | 7 | 6 | MG792171 | Pfleger et al. [4]        |
| <i>Squalus cubensis</i>   | Gulf of Mexico - Mexico    | MG792173ScuMEX | 3 | 7 | 6 | MG792173 | Pfleger et al. [4]        |
| <i>Squalus albicaudus</i> | Rio de Janeiro - Brazil    | 89714SalBRA    | 3 | 7 | 7 | ON827468 | this study                |
| <i>Squalus albicaudus</i> | Rio de Janeiro - Brazil    | 89715SalBRA    | 3 | 7 | 7 | ON827458 | this study                |
| <i>Squalus albicaudus</i> | Rio de Janeiro - Brazil    | 89710SalBRA    | 3 | 7 | 7 | ON827459 | this study                |
| <i>Squalus albicaudus</i> | Rio de Janeiro - Brazil    | 89708SalBRA    | 3 | 7 | 7 | ON827460 | this study                |
| <i>Squalus albicaudus</i> | Rio de Janeiro - Brazil    | 89706SalBRA    | 3 | 7 | 7 | ON827461 | this study                |
| <i>Squalus albicaudus</i> | Pernambuco - Brazil        | 140FCSalBRA    | 3 | 7 | 7 | ON827466 | this study                |
| <i>Squalus albicaudus</i> | Pernambuco - Brazil        | 066FCSalBRA    | 3 | 7 | 7 | ON827467 | this study                |
| <i>Squalus albicaudus</i> | Pernambuco - Brazil        | 223FCSalBRA    | 3 | 7 | 7 | ON827463 | this study                |
| <i>Squalus albicaudus</i> | Pernambuco - Brazil        | 233FCSalBRA    | 3 | 7 | 7 | ON827462 | this study                |
| <i>Squalus albicaudus</i> | Pernambuco - Brazil        | 190FCSalBRA    | 3 | 7 | 7 | ON827465 | this study                |
| <i>Squalus albicaudus</i> | Pernambuco - Brazil        | 218FCSalBRA    | 3 | 7 | 7 | ON827464 | this study                |
| <i>Squalus albicaudus</i> | Rio de Janeiro - Brazil    | 89709SalBRA    | 3 | 7 | 7 | ON827456 | this study                |
| <i>Squalus albicaudus</i> | Rio de Janeiro - Brazil    | 89719SalBRA    | 3 | 7 | 7 | ON827452 | this study                |
| <i>Squalus albicaudus</i> | Rio de Janeiro - Brazil    | 89713SalBRA    | 3 | 7 | 7 | ON827453 | this study                |
| <i>Squalus albicaudus</i> | Rio de Janeiro - Brazil    | 89712SalBRA    | 3 | 7 | 7 | ON827454 | this study                |
| <i>Squalus albicaudus</i> | Rio de Janeiro - Brazil    | 89711SalBRA    | 3 | 7 | 7 | ON827455 | this study                |
| <i>Squalus albicaudus</i> | Rio de Janeiro - Brazil    | 89707SalBRA    | 3 | 7 | 7 | ON827457 | this study                |
| <i>Squalus albicaudus</i> | Rio de Janeiro - Brazil    | 89795SalBRA    | 3 | 7 | 7 | ON827451 | this study                |
| <i>Squalus albicaudus</i> | Rio de Janeiro - Brazil    | 89796SalBRA    | 3 | 7 | 7 | ON827450 | this study                |
| <i>Squalus albicaudus</i> | Rio de Janeiro - Brazil    | 89798SalBRA    | 3 | 7 | 7 | ON827449 | this study                |
| <i>Squalus albicaudus</i> | Rio de Janeiro - Brazil    | 89799SalBRA    | 3 | 7 | 7 | ON827448 | this study                |
| <i>Squalus edmundsi</i>   | Western Australia          | DQ108258SeAUS  | 2 | 6 | 8 | DQ108258 | Ward et al. [27]          |
| <i>Squalus edmundsi</i>   | Western Australia          | EU399026SeAUS  | 2 | 6 | 8 | EU399026 | Ward et al. [27]          |
| <i>Squalus edmundsi</i>   | Western Australia          | DQ108252SeAUS  | 2 | 6 | 8 | DQ108252 | Ward et al. [27]          |
| <i>Squalus edmundsi</i>   | Western Australia          | DQ108243SeAUS  | 2 | 6 | 8 | DQ108243 | Ward et al. [27]          |
| <i>Squalus edmundsi</i>   | Bali - Indonesia           | EU399025SeIDN  | 2 | 6 | 8 | EU399025 | Ward et al. [27]          |
| <i>Squalus edmundsi</i>   | Australia                  | DQ108245SeAUS  | 2 | 6 | 8 | DQ108245 | Ward et al. [27]          |
| <i>Squalus edmundsi</i>   | Western Australia          | EU399027SeAUS  | 2 | 6 | 8 | EU399027 | Ward et al. [27]          |
| <i>Squalus edmundsi</i>   | Australia                  | DQ108246SeAUS  | 2 | 6 | 8 | DQ108246 | Ward et al. [27]          |
| <i>Squalus edmundsi</i>   | Western Australia          | DQ108251SeAUS  | 2 | 6 | 8 | DQ108251 | Ward et al. [27]          |

|                               |                              |                 |   |   |    |          |                           |
|-------------------------------|------------------------------|-----------------|---|---|----|----------|---------------------------|
| <i>Squalus edmundsi</i>       | Western Australia            | DQ108266SeAUS   | 2 | 6 | 8  | DQ108266 | Ward et al. [27]          |
| <i>Squalus edmundsi</i>       | Western Australia            | DQ108244SeAUS   | 2 | 6 | 8  | DQ108244 | Ward et al. [27]          |
| <i>Squalus edmundsi</i>       | Western Australia            | DQ108265SeAUS   | 2 | 6 | 8  | DQ108265 | Ward et al. [27]          |
| <i>Squalus edmundsi</i>       | Nusa Tenggara Barat - Indone | EF539303SeIDN   | 2 | 6 | 8  | EF539303 | Ward et al. [27]          |
| <i>Squalus edmundsi</i>       | Nusa Tenggara Barat - Indone | EF539304SeIDN   | 2 | 6 | 8  | EF539304 | Ward et al. [27]          |
| <i>Squalus edmundsi</i>       | Nusa Tenggara Barat - Indone | EF539302SeIDN   | 2 | 6 | 8  | EF539302 | Ward et al. [27]          |
| <i>Squalus edmundsi</i>       | Bali - Indonesia             | EF539305SeIDN   | 2 | 6 | 8  | EF539305 | Ward et al. [27]          |
| <i>Squalus edmundsi</i>       | Bali - Indonesia             | EF539306SeIDN   | 2 | 6 | 8  | EF539306 | Ward et al. [27]          |
| <i>Squalus mitsukurii</i>     | Rio Grande do Sul - Brazil   | MG703563SmBRA   | 2 | 4 | 9  | MG703563 | Almeron-Souza et al. [49] |
| <i>Squalus mitsukurii</i>     | California - USA             | 7253SmUSA       | 2 | 4 | 9  | ON827477 | this study                |
| <i>Squalus mitsukurii</i>     | Rio Grande do Sul - Brazil   | MG703564SmBRA   | 2 | 4 | 9  | MG703564 | Almeron-Souza et al. [49] |
| <i>Squalus mitsukurii</i>     | California - USA             | 7265SmUSA       | 2 | 4 | 9  | ON827469 | this study                |
| <i>Squalus cf. mitsukurii</i> | Gulf of Mexico - Mexico      | KX949979ScfmMEX | 2 | 4 | 10 | KX949979 | Verissimo et al. [50]     |
| <i>Squalus cf. mitsukurii</i> | Gulf of Mexico               | KX949974ScfmMEX | 2 | 4 | 10 | KX949974 | Verissimo et al. [21]     |
| <i>Squalus mitsukurii</i>     | California - USA             | 12245SmUSA      | 2 | 4 | 10 | ON827470 | this study                |
| <i>Squalus cf. mitsukurii</i> | Gulf of Mexico - Mexico      | KX949975ScfmMEX | 2 | 4 | 10 | KX949975 | Verissimo et al. [50]     |
| <i>Squalus mitsukurii</i>     | California - USA             | 12240SmUSA      | 2 | 4 | 10 | ON827472 | this study                |
| <i>Squalus mitsukurii</i>     | California - USA             | 12242SmUSA      | 2 | 4 | 10 | ON827471 | this study                |
| <i>Squalus mitsukurii</i>     | California - USA             | 12239SmUSA      | 2 | 4 | 10 | ON827473 | this study                |
| <i>Squalus mitsukurii</i>     | California - USA             | 12237SmUSA      | 2 | 4 | 10 | ON827475 | this study                |
| <i>Squalus mitsukurii</i>     | California - USA             | 12238SmUSA      | 2 | 4 | 10 | ON827474 | this study                |
| <i>Squalus mitsukurii</i>     | California - USA             | 12236SmUSA      | 2 | 4 | 10 | ON827476 | this study                |
| <i>Squalus mitsukurii</i>     | California - USA             | 1968SmUSA       | 2 | 4 | 10 | ON827485 | this study                |
| <i>Squalus mitsukurii</i>     | California - USA             | 1969SmUSA       | 2 | 4 | 10 | ON827486 | this study                |
| <i>Squalus mitsukurii</i>     | Pernambuco - Brazil          | 214FLSmBRA      | 2 | 4 | 10 | ON827483 | this study                |
| <i>squalus mitsukurii</i>     | Pernambuco - Brazil          | 259FLSmBRA      | 2 | 4 | 10 | ON827478 | this study                |
| <i>Squalus mitsukurii</i>     | Pernambuco - Brazil          | 254FLSmBRA      | 2 | 4 | 10 | ON827479 | this study                |
| <i>Squalus mitsukurii</i>     | Pernambuco - Brazil          | 235FLSmBRA      | 2 | 4 | 10 | ON827481 | this study                |
| <i>Squalus mitsukurii</i>     | Pernambuco - Brazil          | 237FLSmBRA      | 2 | 4 | 10 | ON827480 | this study                |
| <i>Squalus mitsukurii</i>     | Pernambuco - Brazil          | 215FLSmBRA      | 2 | 4 | 10 | ON827482 | this study                |
| <i>Squalus mitsukurii</i>     | Pernambuco - Brazil          | 205FLSmBRA      | 2 | 4 | 10 | ON827484 | this study                |
| <i>Squalus clarkae</i>        | northeastern Gulf of Mexico  | MG792164SclGmex | 2 | 4 | 11 | MG792164 | Pfleger et al. [4]        |
| <i>Squalus clarkae</i>        | northeastern Gulf of Mexico  | MG792162SclGmex | 2 | 4 | 11 | MG792162 | Pfleger et al. [4]        |
| <i>Squalus clarkae</i>        | northeastern Gulf of Mexico  | MG792163SclGmex | 2 | 4 | 11 | MG792163 | Pfleger et al. [4]        |
| <i>Squalus clarkae</i>        | northeastern Gulf of Mexico  | MG792161SclGmex | 2 | 4 | 11 | MG792161 | Pfleger et al. [4]        |

|                          |                              |                 |   |   |    |          |                           |
|--------------------------|------------------------------|-----------------|---|---|----|----------|---------------------------|
| <i>Squalus clarkae</i>   | northeastern Gulf of Mexico  | MG792165SclGmex | 2 | 4 | 11 | MG792165 | Pfleger et al. [4]        |
| <i>Squalus grahami</i>   | Queensland - Australia       | EU399028SgAUS   | 2 | 3 | 12 | EU399028 | Ward et al. [27]          |
| <i>Squalus grahami</i>   | New South Whales - Australia | DQ108273SgAUS   | 2 | 3 | 12 | DQ108273 | Ward et al. [27]          |
| <i>Squalus grahami</i>   | New South Whales - Australia | DQ108239SgAUS   | 2 | 3 | 12 | DQ108239 | Ward et al. [27]          |
| <i>Squalus grahami</i>   | New South Whales - Australia | DQ108238SgAUS   | 2 | 3 | 12 | DQ108238 | Ward et al. [27]          |
| <i>Squalus grahami</i>   | New South Whales - Australia | DQ108237SgAUS   | 2 | 3 | 12 | DQ108237 | Ward et al. [27]          |
| <i>Squalus grahami</i>   | New South Whales - Australia | DQ108236SgAUS   | 2 | 3 | 12 | DQ108236 | Ward et al. [27]          |
| <i>Squalus grahami</i>   | New South Whales - Australia | DQ108235SgAUS   | 2 | 3 | 12 | DQ108235 | Ward et al. [27]          |
| <i>Squalus japonicus</i> | Taikyuson Seamount - Japan   | MT123853SjJPN   | 2 | 5 | 13 | MT123853 | Ziadi-Künzli et al. [25]  |
| <i>Squalus japonicus</i> | Taikyuson Seamount - Japan   | MT123854SjJPN   | 2 | 5 | 13 | MT123854 | Ziadi-Künzli et al. [25]  |
| <i>Squalus japonicus</i> | Taikyuson Seamount - Japan   | MT123852SjJPN   | 2 | 5 | 13 | MT123852 | Ziadi-Künzli et al. [25]  |
| <i>Squalus japonicus</i> | Taikyuson Seamount - Japan   | MT123851SjJPN   | 2 | 5 | 13 | MT123851 | Ziadi-Künzli et al. [25]  |
| <i>Squalus japonicus</i> | Taikyuson Seamount - Japan   | MT123850SjJPN   | 2 | 5 | 13 | MT123850 | Ziadi-Künzli et al. [25]  |
| <i>Squalus japonicus</i> | Taikyuson Seamount - Japan   | MT123849SjJPN   | 2 | 5 | 13 | MT123849 | Ziadi-Künzli et al. [25]  |
| <i>Squalus japonicus</i> | Tawian                       | MK012557SjTWN   | 2 | 5 | 13 | MK012557 | Daly-Engel et al. [3]     |
| <i>Squalus japonicus</i> | Tawian                       | MK005129SjTWN   | 2 | 5 | 13 | MK005129 | Daly-Engel et al. [3]     |
| <i>Squalus japonicus</i> | Tawian                       | MK005128SjTWN   | 2 | 5 | 13 | MK005128 | Daly-Engel et al. [3]     |
| <i>Squalus japonicus</i> | Suruga Bay - Japan           | MK005127SjJPN   | 2 | 5 | 13 | MK005127 | Daly-Engel et al. [3]     |
| <i>Squalus japonicus</i> | Suruga Bay - Japan           | MK005130SjJPN   | 2 | 5 | 13 | MK005130 | Daly-Engel et al. [3]     |
| <i>Squalus acanthias</i> | Nova Scotia - Canada         | KC015924SaCAN   | 1 | 1 | 14 | KC015924 | Mccusker et al. [51]      |
| <i>Squalus acanthias</i> | Patagonia - Argentina        | Sq72SaARG       | 1 | 1 | 14 | ON827422 | this study                |
| <i>Squalus acanthias</i> | Patagonia - Argentina        | Sq105SaARG      | 1 | 1 | 14 | ON827423 | this study                |
| <i>Squalus acanthias</i> | Massachusetts - USA          | KC015925SaUSA   | 1 | 1 | 14 | KC015925 | Mccusker et al. [51]      |
| <i>Squalus acanthias</i> | North Sea                    | KJ205208SaNsea  | 1 | 1 | 14 | KJ205208 | Knebelsberger et al. [52] |
| <i>Squalus acanthias</i> | North Sea                    | KJ205210SaNsea  | 1 | 1 | 14 | KJ205210 | Knebelsberger et al. [52] |
| <i>Squalus acanthias</i> | Argentina                    | EU074606SaARG   | 1 | 1 | 15 | EU074606 | Mabragana et al. [31]     |
| <i>Squalus acanthias</i> | Patagonia - Argentina        | 060UNMDPSaPata  | 1 | 1 | 15 | ON827418 | this study                |
| <i>Squalus acanthias</i> | Patagonia - Argentina        | 059UNMDPSaPata  | 1 | 1 | 15 | ON827419 | this study                |
| <i>Squalus acanthias</i> | Argentina                    | EU074605SaARG   | 1 | 1 | 15 | EU074605 | Mabragana et al. [31]     |
| <i>Squalus acanthias</i> | Patagonia - Argentina        | 058UNMDPSaPata  | 1 | 1 | 15 | ON827420 | this study                |
| <i>Squalus acanthias</i> | Patagonia - Argentina        | 056UNMDPSaPata  | 1 | 1 | 15 | ON827421 | this study                |
| <i>Squalus acanthias</i> | Patagonia - Argentina        | SQ13SaARG       | 1 | 1 | 16 | ON827427 | this study                |
| <i>Squalus acanthias</i> | Patagonia - Argentina        | Sq108SaARG      | 1 | 1 | 16 | ON827428 | this study                |
| <i>Squalus acanthias</i> | Patagonia - Argentina        | Sq35SaARG       | 1 | 1 | 16 | ON827426 | this study                |
| <i>Squalus acanthias</i> | Argentina                    | EU074608SaARG   | 1 | 1 | 16 | EU074608 | Mabragana et al. [31]     |

|                          |                       |                |   |   |    |          |                           |
|--------------------------|-----------------------|----------------|---|---|----|----------|---------------------------|
| <i>Squalus acanthias</i> | USA                   | KC015929SaUSA  | 1 | 1 | 16 | KC015929 | Mccusker et al. [51]      |
| <i>Squalus acanthias</i> | Argentina             | EU074599SaARG  | 1 | 1 | 16 | EU074599 | Mabragana et al. [31]     |
| <i>Squalus acanthias</i> | USA                   | KC015927SaUSA  | 1 | 1 | 16 | KC015927 | Mccusker et al. [51]      |
| <i>Squalus acanthias</i> | Patagonia - Argentina | Sq54SaARG      | 1 | 1 | 16 | ON827424 | this study                |
| <i>Squalus acanthias</i> | Patagonia - Argentina | Sq102SaARG     | 1 | 1 | 16 | ON827425 | this study                |
| <i>Squalus acanthias</i> | Patagonia - Argentina | Sq45SaARG      | 1 | 1 | 16 | ON827431 | this study                |
| <i>Squalus acanthias</i> | Patagonia - Argentina | Sq42SaARG      | 1 | 1 | 16 | ON827432 | this study                |
| <i>Squalus acanthias</i> | Patagonia - Argentina | Sq32SaARG      | 1 | 1 | 16 | ON827433 | this study                |
| <i>Squalus acanthias</i> | Patagonia - Argentina | Sq31SaARG      | 1 | 1 | 16 | ON827434 | this study                |
| <i>Squalus acanthias</i> | Patagonia - Argentina | Sq101SaARG     | 1 | 1 | 16 | ON827447 | this study                |
| <i>Squalus acanthias</i> | Patagonia - Argentina | SQ29SaARG      | 1 | 1 | 16 | ON827435 | this study                |
| <i>Squalus acanthias</i> | Patagonia - Argentina | SQ16SaARG      | 1 | 1 | 16 | ON827436 | this study                |
| <i>Squalus acanthias</i> | Patagonia - Argentina | SQ15SaARG      | 1 | 1 | 16 | ON827437 | this study                |
| <i>Squalus acanthias</i> | Patagonia - Argentina | SQ12SaARG      | 1 | 1 | 16 | ON827438 | this study                |
| <i>Squalus acanthias</i> | Patagonia - Argentina | SQ11SaARG      | 1 | 1 | 16 | ON827439 | this study                |
| <i>Squalus acanthias</i> | Patagonia - Argentina | Sq103SaARG     | 1 | 1 | 16 | ON827446 | this study                |
| <i>Squalus acanthias</i> | Patagonia - Argentina | Sq104SaARG     | 1 | 1 | 16 | ON827445 | this study                |
| <i>Squalus acanthias</i> | Patagonia - Argentina | Sq106SaARG     | 1 | 1 | 16 | ON827444 | this study                |
| <i>Squalus acanthias</i> | Patagonia - Argentina | Sq107SaARG     | 1 | 1 | 16 | ON827443 | this study                |
| <i>Squalus acanthias</i> | Patagonia - Argentina | SQ110SaARG     | 1 | 1 | 16 | ON827442 | this study                |
| <i>Squalus acanthias</i> | Patagonia - Argentina | SQ116SaARG     | 1 | 1 | 16 | ON827440 | this study                |
| <i>Squalus acanthias</i> | Patagonia - Argentina | SQ111SaARG     | 1 | 1 | 16 | ON827441 | this study                |
| <i>Squalus acanthias</i> | Patagonia - Argentina | Sq66SaARG      | 1 | 1 | 16 | ON827430 | this study                |
| <i>Squalus acanthias</i> | Patagonia - Argentina | Sq70SaARG      | 1 | 1 | 16 | ON827429 | this study                |
| <i>Squalus acanthias</i> | Argentina             | EU074600SaARG  | 1 | 1 | 17 | EU074600 | Mabragana et al. [31]     |
| <i>Squalus acanthias</i> | Massachusetts, USA    | KC015928SaUSA  | 1 | 1 | 17 | KC015928 | Mccusker et al. [51]      |
| <i>Squalus acanthias</i> | North Sea             | KJ205207SaNsea | 1 | 1 | 17 | KJ205207 | Knebelsberger et al. [52] |
| <i>Squalus acanthias</i> | North Sea             | KJ205209SaNsea | 1 | 1 | 17 | KJ205209 | Knebelsberger et al. [52] |
| <i>Squalus acanthias</i> | Tasmania - Australia  | DQ108279SaAUS  | 1 | 1 | 17 | DQ108279 | Ward et al. [40]          |
| <i>Squalus acanthias</i> | Tasmania - Australia  | DQ108280SaAUS  | 1 | 1 | 17 | DQ108280 | Ward et al. [40]          |
| <i>Squalus acanthias</i> | Tasmania - Australia  | DQ108281SaAUS  | 1 | 1 | 17 | DQ108281 | Ward et al. [40]          |
| <i>Squalus acanthias</i> | Tasmania - Australia  | DQ108282SaAUS  | 1 | 1 | 17 | DQ108282 | Ward et al. [40]          |
| <i>Squalus acanthias</i> | Argentina             | EU074601SaARG  | 1 | 1 | 17 | EU074601 | Mabragana et al. [31]     |
| <i>Squalus acanthias</i> | Uruguay               | EU074602SaURY  | 1 | 1 | 17 | EU074602 | Mabragana et al. [31]     |
| <i>Squalus acanthias</i> | Argentina             | EU074603SaARG  | 1 | 1 | 17 | EU074603 | Mabragana et al. [31]     |

|                          |                           |                |   |   |    |          |                          |
|--------------------------|---------------------------|----------------|---|---|----|----------|--------------------------|
| <i>Squalus acanthias</i> | Argentina                 | EU074604SaARG  | 1 | 1 | 17 | EU074604 | Mabragana et al. [31]    |
| <i>Squalus acanthias</i> | New Brunswick - Canada    | KC015926SaCAN  | 1 | 1 | 17 | KC015926 | Mccusker et al. [51]     |
| <i>Squalus acanthias</i> | New Brunswick - Canada    | KC015930SaCAN  | 1 | 1 | 17 | KC015930 | Mccusker et al. [51]     |
| <i>Squalus acanthias</i> | North Sea                 | KJ205206SaNsea | 1 | 1 | 17 | KJ205206 | Knebelberger et al. [52] |
| <i>Squalus acanthias</i> | Maine - USA               | MG299079SaUSA  | 1 | 1 | 17 | MG299079 | Landry(Unpublished)      |
| <i>Squalus acanthias</i> | Argentina                 | EU074607SaARG  | 1 | 1 | 18 | EU074607 | Mabragana et al. [31]    |
| <i>Squalus acanthias</i> | Tasmania - Australia      | DQ108267SaAUS  | 1 | 1 | 18 | DQ108267 | Ward et al. [40]         |
| <i>Squalus acanthias</i> | United Kingdom            | EF539281SaGBR  | 1 | 1 | 18 | EF539281 | Ward et al. [27]         |
| <i>Squalus acanthias</i> | Chile                     | EF539285SaCHL  | 1 | 1 | 18 | EF539285 | Ward et al. [27]         |
| <i>Squalus acanthias</i> | United Kingdom            | EF539278SaGBR  | 1 | 1 | 18 | EF539278 | Ward et al. [27]         |
| <i>Squalus acanthias</i> | United Kingdom            | EF539280SaGBR  | 1 | 1 | 18 | EF539280 | Ward et al. [27]         |
| <i>Squalus acanthias</i> | United Kingdom            | EF539279SaGBR  | 1 | 1 | 18 | EF539279 | Ward et al. [27]         |
| <i>Squalus acanthias</i> | Chile                     | EF539286SaCHL  | 1 | 1 | 18 | EF539286 | Ward et al. [27]         |
| <i>Squalus acanthias</i> | Chile                     | EF539284SaCHL  | 1 | 1 | 18 | EF539284 | Ward et al. [27]         |
| <i>Squalus acanthias</i> | Chile                     | EF539283SaCHL  | 1 | 1 | 18 | EF539283 | Ward et al. [27]         |
| <i>Squalus acanthias</i> | Chile                     | EF539282SaCHL  | 1 | 1 | 18 | EF539282 | Ward et al. [27]         |
| <i>Squalus suckleyi</i>  | British Columbia - Canada | FJ165375SsCAN  | 1 | 2 | 19 | FJ165375 | Steinke et al. [47]      |
| <i>Squalus suckleyi</i>  | British Columbia - Canada | FJ165376SsCAN  | 1 | 2 | 19 | FJ165376 | Steinke et al. [47]      |
| <i>Squalus suckleyi</i>  | British Columbia - Canada | FJ165374SsCAN  | 1 | 2 | 19 | FJ165374 | Steinke et al. [47]      |
| <i>Squalus suckleyi</i>  | British Columbia - Canada | FJ165373SsCAN  | 1 | 2 | 19 | FJ165373 | Steinke et al. [47]      |
| <i>Squalus suckleyi</i>  | British Columbia - Canada | FJ165371SsCAN  | 1 | 2 | 19 | FJ165371 | Steinke et al. [47]      |
| <i>Squalus suckleyi</i>  | British Columbia - Canada | FJ165369SsCAN  | 1 | 2 | 19 | FJ165369 | Steinke et al. [47]      |
| <i>Squalus suckleyi</i>  | British Columbia - Canada | FJ165368SsCAN  | 1 | 2 | 19 | FJ165368 | Steinke et al. [47]      |
| <i>Squalus suckleyi</i>  | USA                       | EF539273SsUSA  | 1 | 2 | 19 | EF539273 | Ward et al. [27]         |
| <i>Squalus suckleyi</i>  | USA                       | EF539274SsUSA  | 1 | 2 | 19 | EF539274 | Ward et al. [27]         |
| <i>Squalus suckleyi</i>  | USA                       | EF539277SsUSA  | 1 | 2 | 19 | EF539277 | Ward et al. [27]         |
| <i>Squalus suckleyi</i>  | Tohoku-chiho - Japan      | JF952866SsJPN  | 1 | 2 | 19 | JF952866 | Zhang et al. [29]        |
| <i>Squalus suckleyi</i>  | British Columbia - Canada | FJ165372SsCAN  | 1 | 2 | 19 | FJ165372 | Steinke et al. [47]      |
| <i>Squalus suckleyi</i>  | British Columbia - Canada | FJ165370SsCAN  | 1 | 2 | 19 | FJ165370 | Steinke et al. [47]      |
| <i>Squalus suckleyi</i>  | USA                       | EF539275SsUSA  | 1 | 2 | 19 | EF539275 | Ward et al. [27]         |
| <i>Squalus suckleyi</i>  | USA                       | EF539276SsUSA  | 1 | 2 | 19 | EF539276 | Ward et al. [27]         |
